# Supplementary material for: Monolithic photonic architecture for volumetric illumination in plasmonic photocatalysis
Source: Royal Society of Chemistry journal article supplement (doi:10.1039/d5nr04370k), 2026-01-01
Supplement: d5nr04370k1.pdf [file d5nr04370k1.pdf]

## **Supplementary Information**

### **Monolithic Photonic Architecture for Volumetric Illumination in Plasmonic Photocatalysis**

Abraham J. Offen, Wenhao Li, Dmitrii Tsvetkov, Jiawei Liang, Yogendra Kumar Mishra,  
Natalia M. Litchinitser, Jie Liu\*

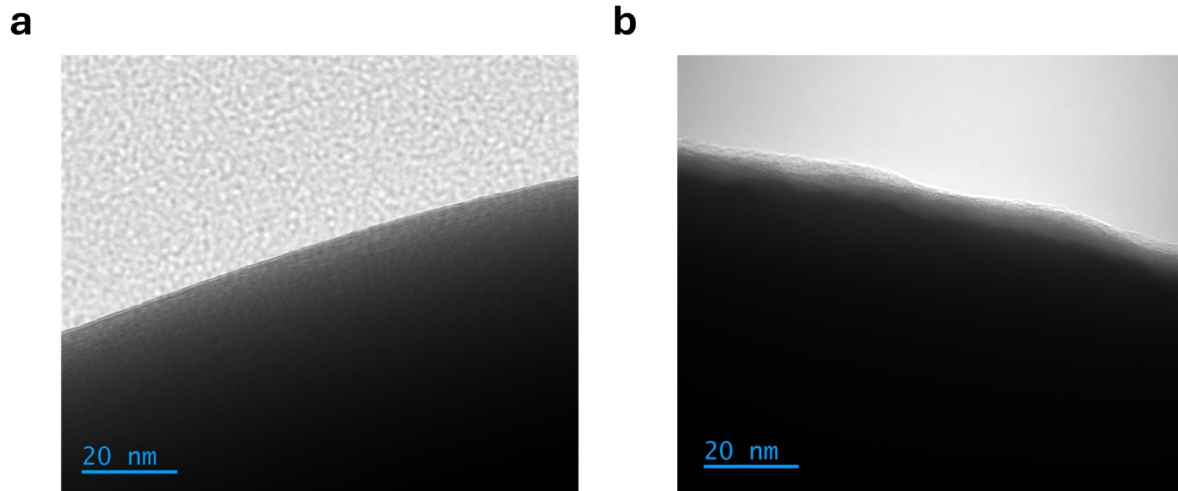

**Figure S1.** TEM images of **(a)** pristine ZnO surface and **(b)** TiO<sub>2</sub>-coated ZnO surface. TiO<sub>2</sub> samples were not further pursued for catalytic and optical measurements but rather used as proof of concept illustrating the ease of surface modification.

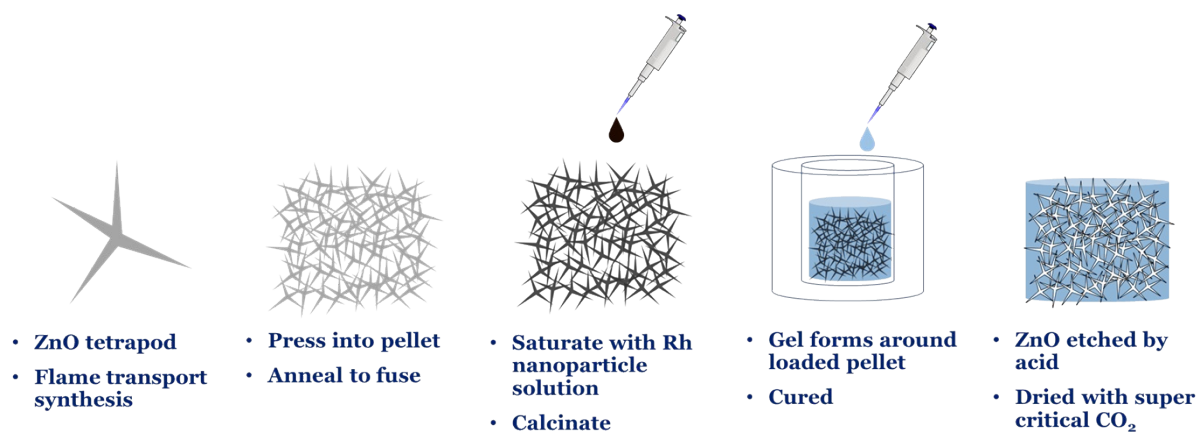

**Figure S2.** Synthetic diagram for monolithic catalysts.

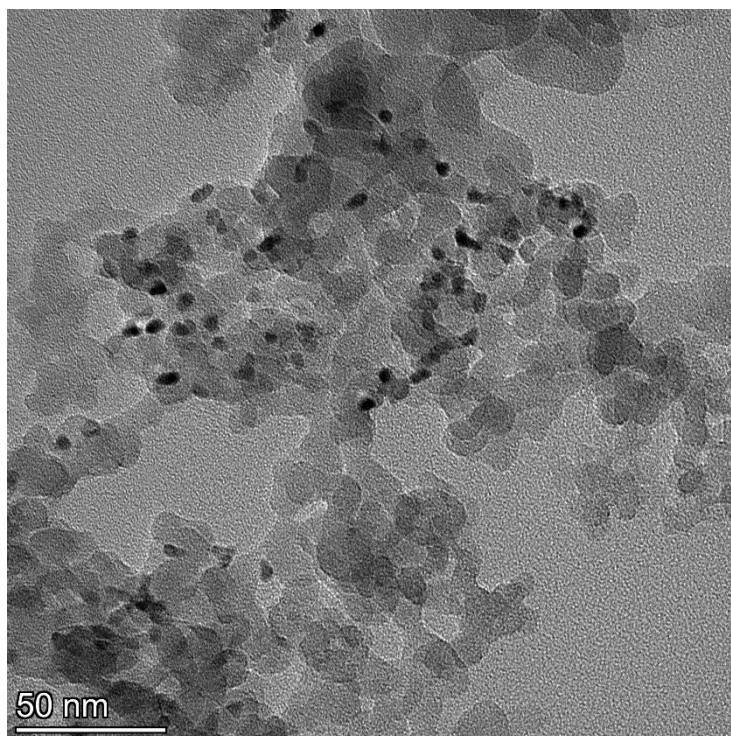

**Figure S3.** TEM image of Rh/SiO<sub>2</sub>-PEA catalyst pellet. For loading onto the TEM grid, the monolith was necessarily ground, destroying the novel porous structure. The Rh nanoparticles are clearly visible amongst the aerogel fragments.

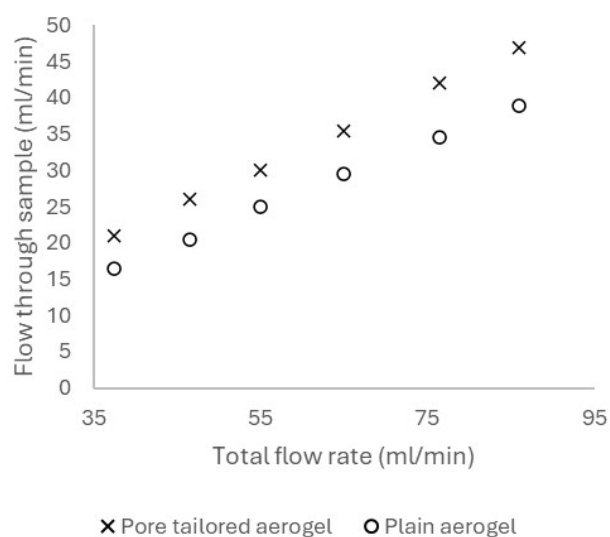

**Figure S4.** Comparison of mass flow between the modified aerogel made using a sacrificial ZnO template and a pristine aerogel. A stream of N<sub>2</sub> was split into two identical paths each containing a sample holder loaded with either the modified or pristine aerogel followed by a flow meter.

**a**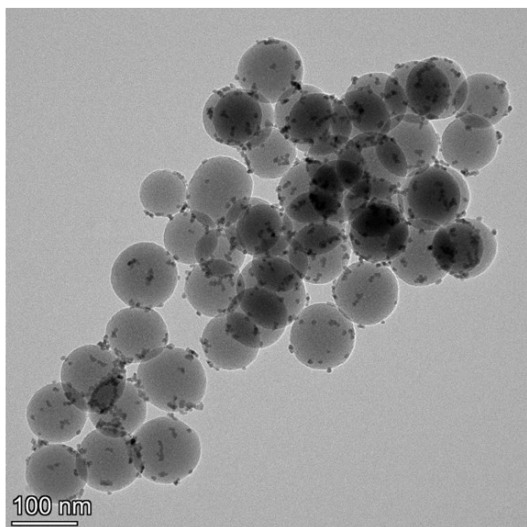**b**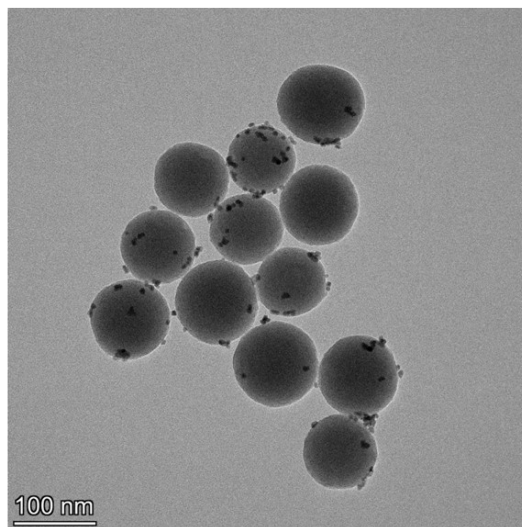

**Figure S5.** (a) TEM image of Rh/SiO<sub>2</sub>-S, powder with Rh concentrated to 6.5 mg SiO<sub>2</sub> placed on the surface, (b) TEM image of Rh/SiO<sub>2</sub>-H, powder with equivalent volumetric loading across 20 mg SiO<sub>2</sub>.

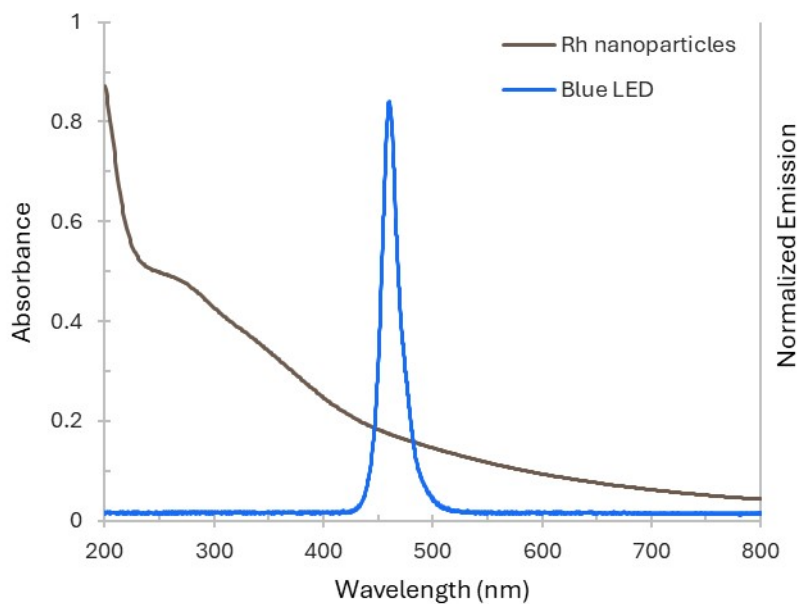

**Figure S6.** Absorption spectrum of Rh nanoparticles in ethanol overlaid with the emission spectrum of the fiber coupled blue LED.

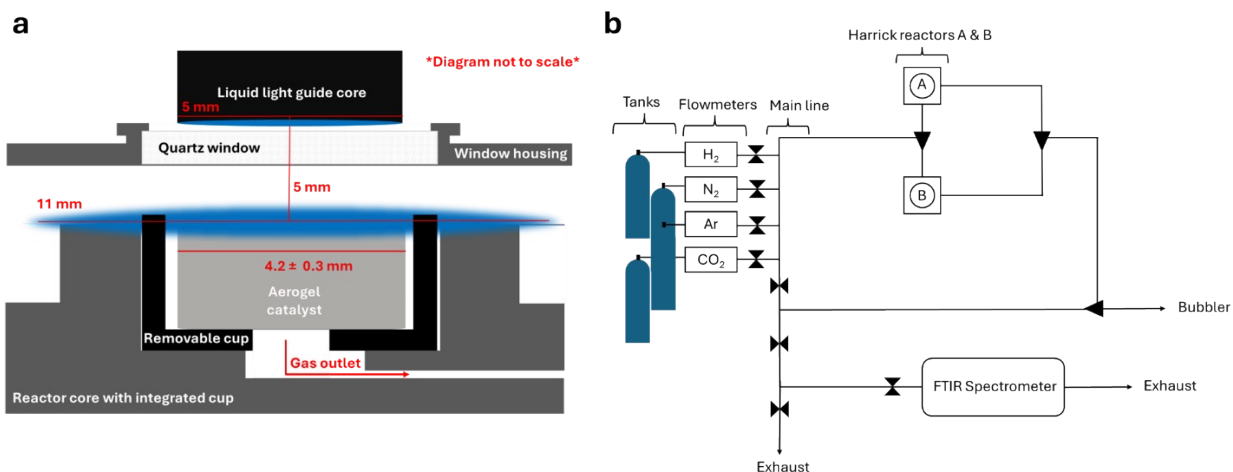

**Figure S7.** (a) Diagram of the illuminated Harrick Raman high pressure reactor loaded with an aerogel sample. (b) Diagram of the catalytic reactor gas and measurement system; reactor B was used for all experiments.

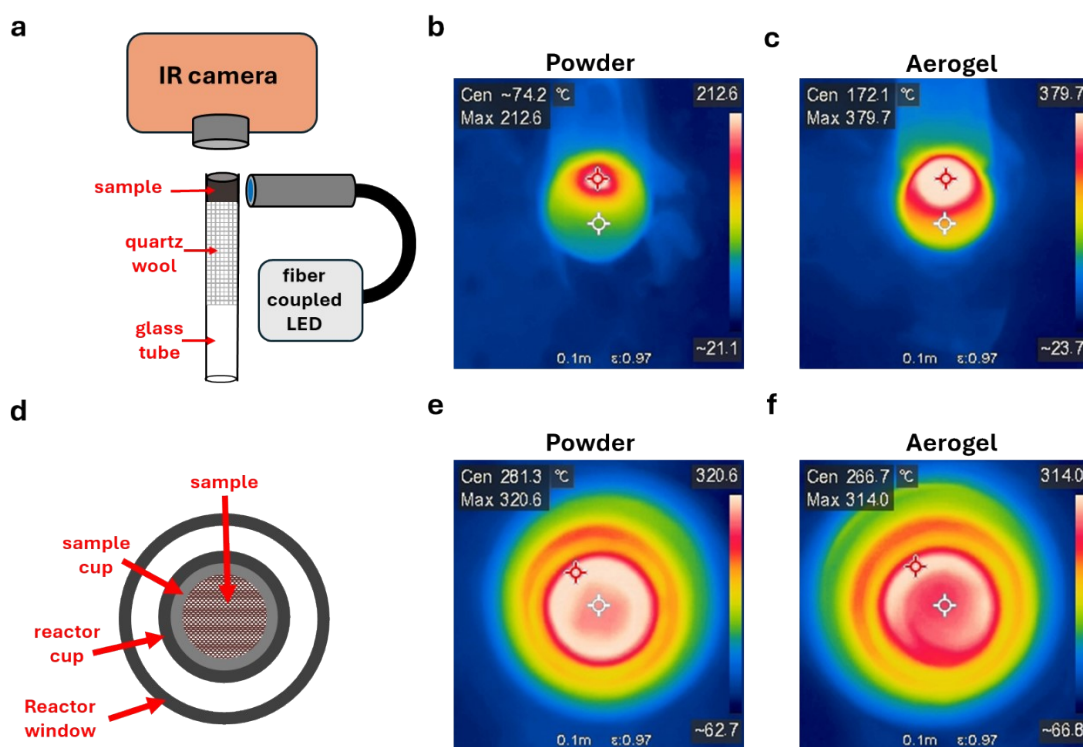

**Figure S8.** (a) Measurement diagram of photothermal energy produced by illumination of the Blue LED (b) uniformly loaded powdered Rh/SiO<sub>2</sub> catalyst (c) porous aerogel catalyst loaded with 0.7% Rh (d) Measurement diagram of thermal energy from the reactor heater. (e) Uniformly loaded powdered Rh/SiO<sub>2</sub> catalyst (f) porous aerogel catalyst loaded with 0.7% Rh. Measurements are considered qualitative due to the limited resolution of the HSF Tools HF96 thermal camera used.

1.  $\text{CO}_{2(\text{g})} + 2 * \rightleftharpoons \text{CO}^* + \text{O}^*$  Dissociative adsorption
2.  $\text{H}_{2(\text{g})} + 2 * \rightleftharpoons 2\text{H}^*$
3.  $\text{CO}^* \longrightarrow \text{CO}_{(\text{g})} + *$  RDS for CO
4.  $\text{CO}^* + \text{H}^* \rightleftharpoons \text{CHO}^* + *$
5.  $\text{CHO}^* + * \longrightarrow \text{CH}^* + \text{O}^*$  RDS for  $\text{CH}_4$
6.  $\text{O}^* + \text{H}^* \rightleftharpoons \text{OH}^* + *$
7.  $\text{OH}^* + \text{H}^* \rightleftharpoons \text{H}_2\text{O}_{(\text{g})} + 2*$
8.  $\text{CH}^* + \text{H}^* \rightleftharpoons \text{CH}_2^* + *$
9.  $\text{CH}_2^* + \text{H}^* \rightleftharpoons \text{CH}_3^* + *$
10.  $\text{CH}_3^* + \text{H}^* \rightleftharpoons \text{CH}_{4(\text{g})} + 2*$

**Figure S9.** Competing mechanisms of  $\text{CO}_2$  evolution on plasmonic Rh catalyst as proposed in ref. 12. \* denotes a surface binding site.

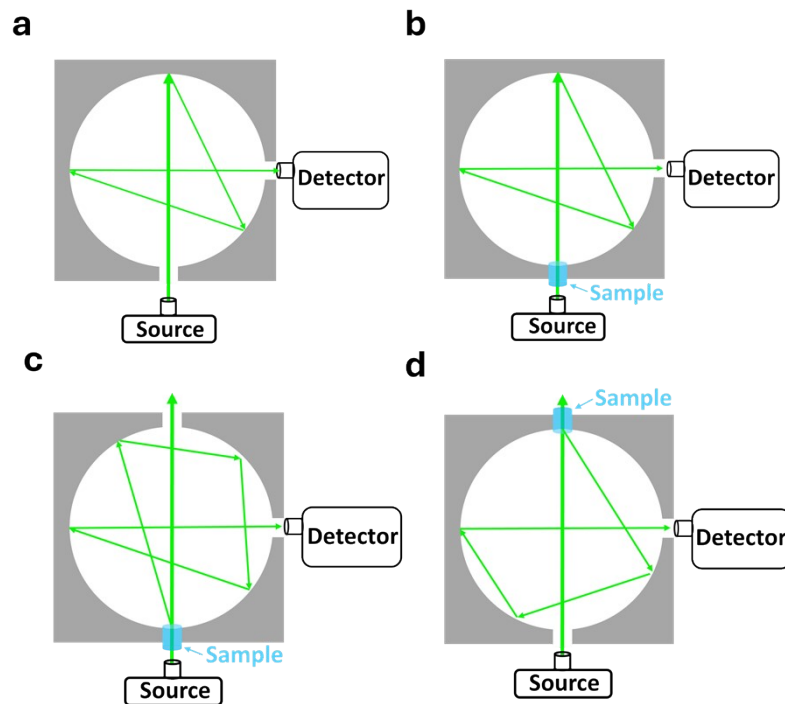

**Figure S10.** Measurement diagram of **(a)** total power, allows for normalization of transmission, diffusion and reflection data **(b)** sample transmittance, the sum of direct and scattered transmission, **(c)** sample diffusion measures light scattered by the samples internal structure **(d)** sample reflection measures reflected light, enables calculation of absorption coefficient.

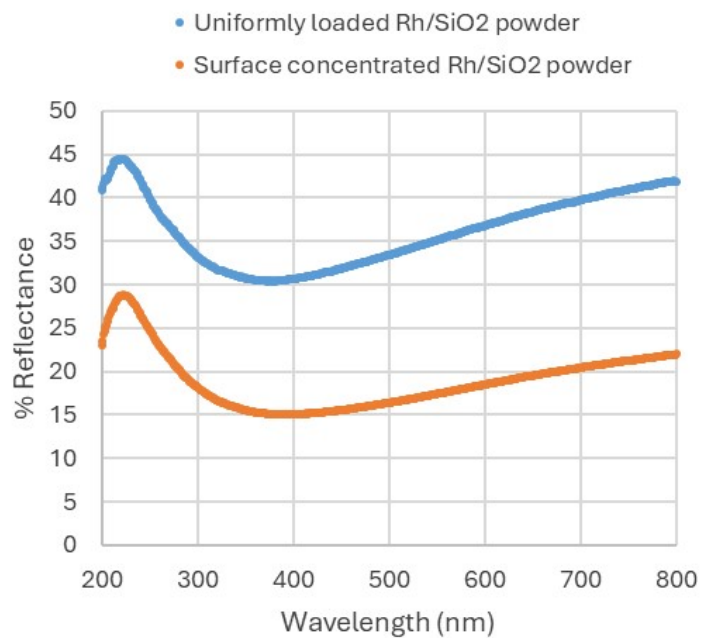

**Figure S11.** Reflectance measurements of the powdered Rh/SiO<sub>2</sub> catalysts.

**Table S1. Cumulative distribution fit**

| <u>Sample</u> | <u><math>\lambda</math> (95% confidence interval)</u> | <u><math>R^2</math></u> |
|---------------|-------------------------------------------------------|-------------------------|
| 0.4 wt. %     | 1.067 (1.051 1.082)                                   | 0.9886                  |
| 1.7 wt. %     | 1.932 (1.925 1.939)                                   | 0.9995                  |



| Monolithic architecture                                     | Synthetic conditions       | Source of porosity         | Porosity                          | Loaded absorber                          | Relative visible reflectance               | Relative density | Performance analysis                              | Ref. |
|-------------------------------------------------------------|----------------------------|----------------------------|-----------------------------------|------------------------------------------|--------------------------------------------|------------------|---------------------------------------------------|------|
| Ni foam – dip coated                                        | Purchased                  | Purchased foam             | mm scale                          | $\text{In}_2\text{O}_{3-x}(\text{OH})_y$ | High - reflective reactor                  | Moderate         | $\text{CO}_2$ reduction                           | 39   |
| Reticulated $\alpha\text{-Al}_2\text{O}_3$ foam             | Purchased                  | Purchased foam             | mm scale                          | none                                     | High – reflective reactor                  | Moderate         | Bulk optical simulation                           | 40   |
| Zirconia foam – dip coated                                  | Purchased                  | Purchased foam             | mm scale                          | Cu-doped $\text{TiO}_2$                  | High – reflective reactor                  | Moderate         | $\text{CO}_2$ reduction                           | 48   |
| Bundled quartz tubes – dip coated                           | Purchased tubes            | Gaps between tubes         | mm scale                          | Cu-doped $\text{TiO}_2$                  | Low – reflective reactor                   | High             | $\text{CO}_2$ reduction & bulk optical simulation | 48   |
| “Waveguide photoreactor”<br>quartz rods – roll coated       | Purchased rod              | Gaps between nanorods      | nm- $\mu\text{m}$ scale           | $\text{In}_2\text{O}_{3-x}(\text{OH})_y$ | Low-reflective reactor                     | High             | $\text{CO}_2$ reduction                           | 41   |
| Inverse opal                                                | Mild – sol gel             | Sacrificial PS nanospheres | nm scale                          | Au nanoparticles                         | Size dependent – slow photons improve abs. |                  | 2,4-dichlorophenol degradation                    | 49   |
| $\text{SiO}_2$ opal                                         | Mild – sol gel             | Gaps between nanospheres   | nm scale                          | Ag nanoparticles                         | Size dependent – slow photons improve abs. | Moderate         | $\text{H}_2$ production (sacrificial MeOH)        | 50   |
| $\text{SiO}_2$ opal – This work                             | Mild – sol gel             | Gaps between nanospheres   | nm scale                          | Rh nanoparticles                         | High                                       | Moderate         | $\text{CO}_2$ reduction                           | N/A  |
| Boron nitride “artificial solid fog”                        | Highly sensitive           | Sacrificial ZnO tetrapods  | $\mu\text{m}$ scale – very high   | none                                     | Low                                        | Ultra-low        | Optical analysis                                  | 54   |
| $\text{SiO}_2$ “aeroglass”                                  | Mild                       | Sacrificial ZnO tetrapods  | $\mu\text{m}$ scale – very high   | rGO flakes                               | Low                                        | Ultra-low        | Optical & photothermal analysis                   | 55   |
| $\text{Ce}_{1-x}\text{Zn}_x\text{O}_{2-\delta}$ “aeroglass” | Mild                       | Sacrificial ZnO tetrapods  | $\mu\text{m}$ scale – very high   | Rh nanoparticles                         | Low                                        | Ultra-low        | Gas flow analysis                                 | 56   |
| $\text{TiO}_2$ aerogel –surface functionalized              | Harsh & sensitive –sol gel | Native pores               | nm scale                          | Pd, PdAu, nanoparticles                  | Low                                        | Low              | $\text{H}_2$ production                           | 43   |
| $\text{SiO}_2$ aerogel                                      | Mild – sol gel             | Native pores               | nm scale                          | $\text{TiO}_2$ nanoparticles             | Low                                        | Low              | Phenol degradation                                | 47   |
| $\text{TiO}_2$ aerogel on 3D printed template               | Harsh & sensitive –sol gel | 3D printed template        | mm and nm scale                   | Pd nanoparticles                         | Low                                        | Low              | $\text{H}_2$ production                           | 44   |
| This work (pore enhanced aerogel) – drop cast               | Mild – sol gel             | Sacrificial ZnO tetrapods  | $\mu\text{m}$ and nm scale - high | Rh nanoparticles                         | Low                                        | Low              | $\text{CO}_2$ reduction & bulk optical            | N/A  |

**Table S2** Comparative overview of selected monolithic optically designed photocatalysts. This non-exhaustive table is color coded by architecture type. Key trends including pore nature, use of reflective reactors, and bulk optical simulations are noted where applicable. Density can be a proxy for ease of handling since denser optical monoliths are generally sturdier.
